# Supplementary material
Source: publisher figshare collection journal article supplement (https://gsapubs.figshare.com/ndownloader/files/23294342)
Supplement: Supplementary file 1 [file 23294342]

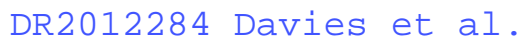

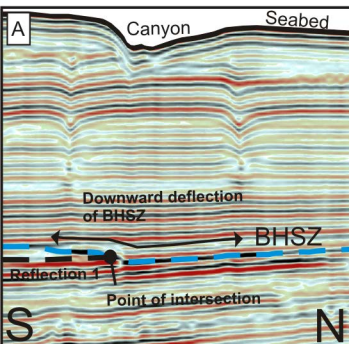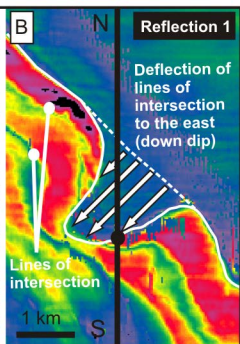

Figure DR 2 : Representative seismic line showing canyon at the seafloor and deepening of the BHSZ below it. Black dashed line – present BHSZ. Green dot - point of intersection between reflection 1 and the present BHSZ. B: RMS amplitude map of reflection 1 showing deflection of lines of intersection. Full white line - the line of intersection between the present day BHSZ and reflection 1. Dashed white line - the interpreted position of the line of intersection if the canyon had not developed here. Black dot – point of intersection of the present day BHSZ.
